# Supplementary material
Source: publisher site journal article supplement (https://www.spandidos-publications.com/5654/downloadSupplementary)

Figure S1. *In situ* hybridization. Representative (A) CTC<sup>-</sup> and CTC<sup>+</sup> and (B) CTC<sup>+</sup>/OCT4<sup>-</sup> and CTC<sup>+</sup>/OCT4<sup>+</sup> of patients with metastatic castration-resistant PC treated with abiraterone + prednisone. Blue, blood cells; green, PC cells; red, OCT4. CTCs exhibited blue and green staining; CTC<sup>+</sup>/OCT4<sup>+</sup> stained blue, green and red. Magnification, x400. CTC, circulating tumor cell; OCT4, octamer-binding transcription factor 4; DAPI, 4',6-diamidino-2-phenylindole; EpCAM, epithelial cell adhesion molecule; PC, prostate cancer.

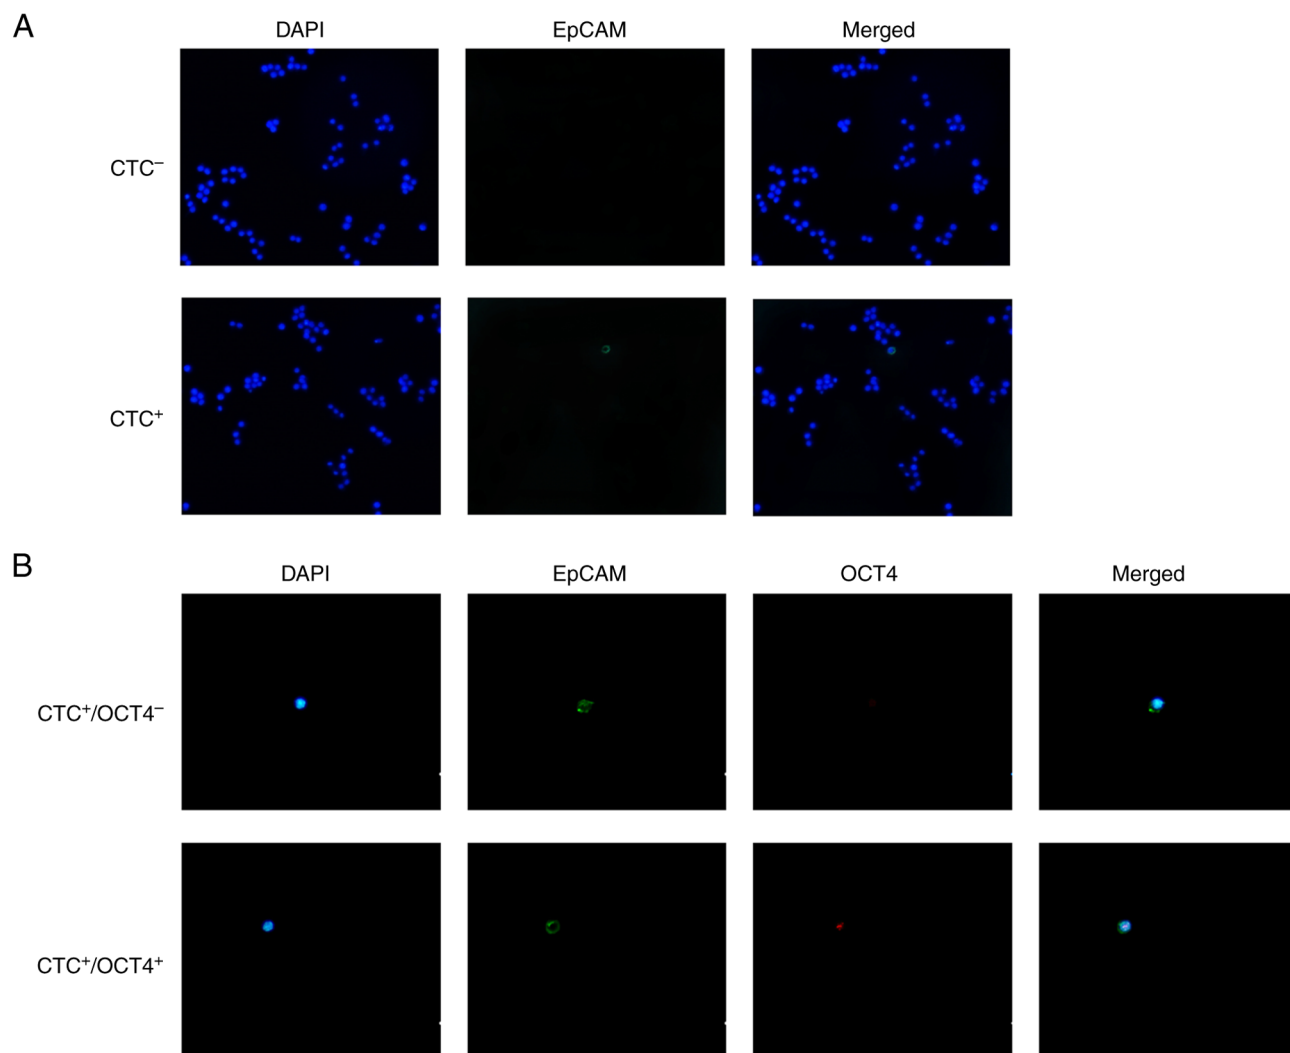

Supplement: Supplementary file 1 [file downloadSupplementary]
